# Supplementary material
Source: Elsevier journal article supplement (https://www.sciencedirect.com/science/article/pii/S0300289622004525)
Supplement: mmc1 [file S0300289622004525:mmc1.pdf]

## **EDITORIAL**

### **Segmentectomia en el cáncer de pulmón como nuevo estándar de tratamiento: ¿menos es más?"**

#### **AUTORES:**

Isea de la Viña J<sup>1</sup>, Ramírez-Rodríguez G<sup>2</sup>, Alcázar- Navarrete B<sup>2,3,4</sup>

<sup>1</sup> Thoracic Surgery Unit. University Hospitals Coventry and Warwickshire, Coventry.

Reino Unido

<sup>2</sup> Servicio de Neumología. Hospital Universitario Virgen de las Nieves. Granada

<sup>3</sup> Departamento de Medicina. Universidad de Granada.

<sup>4</sup> IBS- Granada

#### **Correspondencia**

Dra. G. Ramírez Rodríguez

Servicio de Neumología. HU Virgen de las Nieves.

Avda Fuerzas Armadas sn. 18014. Granada. Spain.

Mail: [gemaramirezrodriguez@hotmail.com](mailto:gemaramirezrodriguez@hotmail.com)

El cáncer de pulmón no célula pequeña (CPNCP) sigue siendo la principal causa de muerte por cáncer en el mundo(1), especialmente en pacientes con enfermedades respiratorias crónicas como la EPOC (Enfermedad Pulmonar Obstructiva Crónica). Los esfuerzos realizados en las últimas décadas tanto en la prevención como en el diagnóstico y tratamiento de este tipo de tumor han llevado a una disminución de las tasas de mortalidad ajustadas por edad (especialmente en varones) (2) y a la detección de tumores de menor tamaño en el momento del diagnóstico.

Hoy en día el tratamiento de elección para el CPNCP de pequeño tamaño es la resección quirúrgica del tumor mediante lobectomía junto con la disección ganglionar(3), preferentemente mediante VATS (*video assisted thoracic surgery*, cirugía torácica video asistida). Las guías de práctica clínica de tratamiento del CPNCP recomiendan el empleo de resecciones sublobares como la segmentectomía sólo para los pacientes que no tolerarían dicho procedimiento por mala función pulmonar o comorbilidad.

Sin embargo, recientemente se han comunicado los resultados del estudio JCOG0802, un ensayo clínico aleatorizado multicéntrico realizado en población japonesa de pacientes con CPNCP estadio IA con  $\leq 2$  cm y una relación entre consolidación y tamaño tumoral  $>0.5$ (4). En este ensayo clínico en fase III los autores incluyeron a más de 1000 participantes aleatorizándolos a un brazo de segmentectomía o a un brazo de lobectomía, con el objetivo principal de demostrar la no inferioridad de la segmentectomía en la supervivencia global frente a lobectomía. Tras un seguimiento medio superior a 7 años, los autores demostraron en el estudio que la segmentectomía era superior a la lobectomía en supervivencia global a 5 años (94.3% vs 91.1, HR 0.663,  $p < 0.005$ ), ofreciendo una supervivencia similar a 5 años libre de recidiva (88.0% vs 87.9%) y con una mayor tasa de recurrencias locales (10.5% vs 5.4%). Sorprendentemente, la mejora de la supervivencia en el grupo de segmentectomía pareció deberse a una disminución de las muertes por segundo cáncer y en menor medida por enfermedades no relacionadas con el cáncer.

Los resultados de este estudio han sido objeto de gran interés por parte de la comunidad científica desde su comunicación inicial en el año 2021, pero también han sido objeto de

dudas por el cambio de paradigma que supone en el tratamiento quirúrgico del CPNCP. ¿Es este estudio suficientemente sólido para llevar a la población médica y las organizaciones actuales a cambiar sus reglas y convertir la segmentectomía en el procedimiento de elección para el tratamiento quirúrgico del CPNCP? Diversos estudios previamente publicados ayudan a sostener el beneficio de la segmentectomía frente a la lobectomía observado por Saji y colaboradores.

En un estudio retrospectivo publicado en el 2016 (5)312 pacientes con CPNCP en estadio clínico IA se comparó el resultado entre pacientes sometidos a segmentectomía o lobectomía pulmonar, evidenciándose similitud en la supervivencia a los 5 y 10 años en ambos grupos. Específicamente, el resultado oncológico de los pacientes recibiendo segmentectomía fue ligeramente superior a los de aquellos sometidos a lobectomía, al obtener el primer grupo tasas de supervivencia de 97.5 % y 83,5%, a los 5 y 10 años respectivamente, comparado con 87.75% y 75.0% en el grupo de lobectomía.

Posteriormente, una revisión sistemática del 2017 basada en datos retrospectivos de 24.542 pacientes, encontró que la supervivencia en pacientes con CPNCP en estadio I que fueron sometidos a segmentectomías como tratamiento no variaba con respecto a los pacientes que fueron sometidos a lobectomías, al obtener un HR (riesgo relativo) de 1,04 (intervalo de confianza al 95% 0.92-1.18; P=0.50)(6).

Una revisión sistemática y metaanálisis reciente que incluyó 16 estudios concluyó que la lobectomía ofrecía una supervivencia global similar a la de segmentectomía, siendo superior a la resección en cuña. Con este resultado, los autores sugieren posicionar a la segmentectomía como una valiosa alternativa para pacientes con CPNCP menor de 2 cm y evitar la resección en cuña siempre que sea posible(7).

Finalmente un análisis retrospectivo publicado recientemente de un centro de referencia en EEUU concluyó que no existían diferencias en los resultados clínicos (mortalidad a 5 años, recurrencia o supervivencia libre de recurrencia) entre la segmentectomía anatómica y la lobectomía(8).

Con la evidencia de los trabajos anteriormente comentados y la generada por el grupo del estudio JCOG0802, parece claro que la segmentectomía debería posicionarse como el procedimiento quirúrgico de elección para los pacientes con estadios precoces de CPNCP, al ofrecer una supervivencia mejor que la lobectomía, con una mayor preservación de parénquima pulmonar, asumiendo una mayor proporción de recaídas locales en el seguimiento. Además, la segmentectomía permitiría la disección ganglionar sistemática de manera similar a la de una lobectomía(9–11).

Los resultados de este trabajo sólo pueden aplicarse a CPNCP periféricos de menos de 2 cm de diámetro, pero precisamente en este campo es donde están incrementándose los diagnósticos de CPNCP en el campo de la neumología y cirugía torácica, especialmente como consecuencia de los programas de cribado de cáncer de pulmón en población de riesgo(12). Teniendo en cuenta además las características de la población subsidiaria de cribado de cáncer de pulmón, en la que predominan pacientes con EPOC y enfisema previo, es de esperar que este tipo de procedimientos sean realizados cada vez con más frecuencia al incluir pacientes que de otra forma no podrían ser considerados aptos para una lobectomía.

Sin embargo, habrá que tener en cuenta igualmente que la segmentectomía es un procedimiento más complejo técnicamente que la lobectomía, y que precisa de un tiempo quirúrgico mayor(13), lo que debería llevar a un incremento de los tiempos quirúrgicos y de la disponibilidad de quirófanos para poder seguir ofreciendo a los pacientes el menor tiempo de espera para su intervención.

En conclusión, los resultados del estudio JCOG0802 suponen un cambio de mentalidad claro en el tratamiento del CPNCP en estadios iniciales (estadio IA), reforzando la idea de que al menos en este tipo de tumores, la resección de una menor cantidad de tejido puede ofrecer a los pacientes una mejor esperanza de vida. Aunque habrá que analizar profundamente los detalles del trabajo, esperemos que esta nueva evidencia pronto se incorpore a las guías de práctica clínica. Amanecerá y veremos.

### **Conflictos de intereses:**

JIDV declara no tener conflictos de intereses.

GRR declara no tener conflictos de intereses.

BAN declara haber recibido pagos por asesoría y/o actividades científicas en los últimos 3 años de AstraZeneca, Laboratorios Bial, Boehringer Ingelheim, Chiesi, Gilead, GSK, Laboratorios Menarini, MSD, Novartis AG.

## BIBLIOGRAFÍA

1. Dyba T, Randi G, Bray F, Martos C, Giusti F, Nicholson N, et al. The European cancer burden in 2020: Incidence and mortality estimates for 40 countries and 25 major cancers. *Eur J Cancer* 2021;157:308–47.
2. Cayuela L, López-Campos JL, Otero R, Rodríguez Portal JA, Rodríguez-Domínguez S, Cayuela A. The Beginning of the Trend Change in Lung Cancer Mortality Trends in Spain, 1980-2018. *Archivos de Bronconeumología* 2021;57:115–21.
3. Howington JA, Blum MG, Chang AC, Balekian AA, Murthy SC. Treatment of stage I and II non-small cell lung cancer: Diagnosis and management of lung cancer, 3rd ed: American College of Chest Physicians evidence-based clinical practice guidelines. *Chest* 2013;143.
4. Saji H, Okada M, Tsuboi M, Nakajima R, Suzuki K, Aokage K, et al. Segmentectomy versus lobectomy in small-sized peripheral non-small-cell lung cancer (JCOG0802/WJOG4607L): a multicentre, open-label, phase 3, randomised, controlled, non-inferiority trial. *Lancet* 2022;399:1607–17.
5. Kodama K, Higashiyama M, Okami J, Tokunaga T, Imamura F, Nakayama T, et al. Oncologic Outcomes of Segmentectomy Versus Lobectomy for Clinical T1a N0 M0 Non-Small Cell Lung Cancer. *Ann Thorac Surg* 2016;101:504–11.
6. Bedetti B, Bertolaccini L, Rocco R, Schmidt J, Solli P, Scarci M. Segmentectomy versus lobectomy for stage I non-small cell lung cancer: a systematic review and meta-analysis. *J Thorac Dis* 2017;9:1615–23.
7. Shi Y, Wu S, Ma S, Lyu Y, Xu H, Deng L, et al. Comparison Between Wedge Resection and Lobectomy/Segmentectomy for Early-Stage Non-small Cell Lung Cancer: A Bayesian Meta-analysis and Systematic Review. *Annals of Surgical Oncology* 2022;29:1868–79.
8. Chan EG, Chan PG, Mazur SN, Normolle DP, Luketich JD, Landreneau RJ, et al. Outcomes with segmentectomy versus lobectomy in patients with clinical T1cN0M0 non-small cell lung cancer. *J Thorac Cardiovasc Surg* 2021;161:1639-1648.e2.
9. Okada M, Yoshikawa K, Hatta T, Tsubota N. Is segmentectomy with lymph node assessment an alternative to lobectomy for non-small cell lung cancer of 2 cm or smaller? *Ann Thorac Surg* 2001;71:956–60.
10. Mattioli S, Ruffato A, Puma F, Daddi N, Aramini B, D'ovidio F. Does anatomical segmentectomy allow an adequate lymph node staging for cT1a non-small cell lung cancer? *J Thorac Oncol* 2011;6:1537–41.
11. Xiao F, Yu Q, Zhang Z, Liu D, Guo Y, Liang C, et al. Novel perspective to evaluate the safety of segmentectomy: Clinical significance of lobar and segmental lymph node metastasis in cT1N0M0 lung adenocarcinoma. *European Journal of Cardio-Thoracic Surgery* 2018;53:228–34.
12. Seijo LM, Trujillo JC, Zulueta JJ. Screening in Lung Cancer: The Latest Evidence. *Archivos de Bronconeumología* 2020;56:7–8.
13. Mesa-Guzmán M, González J, Alcaide AB, Bertó J, de-Torres JP, Campo A, et al. Surgical Outcomes in a Lung Cancer-Screening Program Using Low Dose Computed Tomography. *Archivos de Bronconeumología* 2021;57:101–6.
